# Supplementary material for: Adaptations to the Welsh National Exercise Referral Scheme during the COVID-19 pandemic: A qualitative study exploring the experiences of service users and providers and supplementary out-of-pocket costs analysis
Source: Research Square preprint supplement (doi:10.21203/rs.3.rs-2671061/v1), 2023-03-20
Supplement: Supplementary file [file cbf5beb5e5f2aecdd2699573.pdf]

# Costs incurred

Record ID \_\_\_\_\_

## Introductory text:

**We would like to understand any costs that service users must pay for themselves to participate in the NERS programme**

Approximately how many weeks of NERS exercise sessions did they have in total? \_\_\_\_\_

What type of sessions did they have?

- ☐ face-to-face only  
☐ virtual only  
☐ Both

On average how many of these sessions did they attend per week? \_\_\_\_\_

(Approx value fine)

For approximately how many of these [ners\_total\_weeks] weeks were the sessions face-to-face? \_\_\_\_\_

During a typical week when they were receiving face-to-face delivery, how many sessions on average were they attending? \_\_\_\_\_

(Approx value fine)

For approximately how many of these [ners\_total\_weeks] weeks were the sessions virtual? \_\_\_\_\_

During a typical week when they were receiving virtual delivery, how many sessions on average were they attending? \_\_\_\_\_

(Approx value fine)

What did they pay for the face-to-face exercise sessions?  
[note whether this was per sessions, per month etc]

What (if anything) did they pay for the virtual exercise sessions/home programme?  
[note whether this was per sessions, per month etc; if nothing enter '0']

What was their main form of travel to their face-to-face exercise sessions?

- ☐ car  
☐ bus  
☐ taxi  
☐ train  
☐ on foot  
☐ bike  
☐ other

Approx how many miles is it from their home to the venue (i.e. one-way only)?  
[Explain that asking this so that can work out cost of travelling by car for them]

(If they don't know, ask them name of home town and where venue located so that we can calculate)

---

How much did they pay for parking (if anything)?  
[if nothing, enter '0']

---

---

What did they pay for a bus ticket?

---

---

Is this the cost given for a single or return bus ticket?

☐ single  
☐ return

---

How much did the taxi cost (one way)?

---

---

How much is a train ticket?

---

---

Is this the cost given for a single or return train ticket?

☐ single  
☐ return

---

Were there any costs associated with this form of travel?  
[If so, detail here (make sure to note whether figure given is for a single or return trip)]

---

---

Did they buy any clothing (e.g. gym clothes, leggings etc) especially for the NERS exercise sessions?

☐ Yes  
☐ No

[regardless of whether for face-to-face or virtual delivery]

---

How much did they spend on clothing?

---

(Approx value fine)

---

Did they buy any footwear (e.g. trainers) especially for the NERS exercise sessions?

☐ Yes  
☐ No

[regardless of whether for face-to-face or virtual delivery]

---

How much did they spend on footwear?

---

(Approx value fine)

---

Did they have to buy any exercise equipment (e.g. gym mat, weights) to enable them to exercise from home?

☐ Yes  
☐ No

---

How much did they spend on equipment?

---

---

Did they have to buy and devices etc (e.g. laptop, tablet, smart tv, cables) so that they could take part in the virtual exercise sessions?

☐ Yes  
☐ No

---

How much did they spend on devices etc?

---

---

What was the main way they connected to the virtual content?

- ☐ Home broadband/fibre  
☐ Through 4G or 5G signal on phone or tablet
- 

How much per month were they paying for their home broadband/fibre at that time?

[if they don't know, ask if know who provider is/was and whether broadband or fibre and then we will try and find out]

---

(Approx value fine)

---

How much per month were they paying for 4G/5G at that time

[if they don't know, ask if know who provider is/was and we will try and find out]

---

(Approx value fine)

---

Did these costs impact on you being able to use/engage with NERS?

- ☐ Yes  
☐ No
- 

Space to note any further comments from participant on costs

---
